# Supplementary material
Source: MDPI journal article supplement (https://www.mdpi.com/2624-5175/5/3/30)
Supplement: s1 [file s1]

## 1. UK Biobank Sociodemographic Indices Relevant to Problematic Sleep Study

### Self-Identified Ethnicity: Response Options

**White:** British, Irish, Any other white background; **Mixed:** White and Black Caribbean, White and Black African, White and Asian, Any other mixed background; **Asian or Asian British:** Indian, Pakistani, Bangladeshi, Chinese, Any other Asian background; **Black or Black British:** Caribbean, African, Any other Black background; **Other ethnic group**

### Education

- 1 College or University degree
- 2 A levels/AS levels or equivalent
- 3 O levels/GCSEs or equivalent
- 4 CSEs (Certificate of Secondary Education) or equivalent
- 5 NVQ or HND or HNC or equivalent
- 6 Other professional qualifications e.g.: nursing, teaching

### Employment

- 1 In paid employment or self-employed
- 2 Retired
- 3 Looking after home and/or family
- 4 Unable to work because of sickness or disability
- 5 Unemployed
- 6 Doing unpaid or voluntary work
- 7 Full or part-time student

### Accommodation

- 1 A house or bungalow
- 2 A flat, maisonette or apartment
- 3 Mobile or temporary structure (i.e., caravan)
- 4 Sheltered accommodation
- 5 Care home

### Home Ownership

- 1 Own outright (by you or someone in your household)
- 2 Own with a mortgage
- 3 Rent - from local authority, local council, housing association
- 4 Rent - from private landlord or letting agency
- 5 Pay part rent and part mortgage (shared ownership)
- 6 Live in accommodation rent free

### Household income

- 1 Less than 18,000
- 2 18,000 to 30,999
- 3 31,000 to 51,999
- 4 52,000 to 100,000
- 5 Greater than 100,000

*NB In 2010 Median individual earnings across the UK was £25,881. In 2022 this was £33,000*

## 2. Sleep Variables:

**Table S1 Response Options, Recoding and Descriptive Statistics**

|                                                                                                           | N, (% sample)  | Mean, SE     | Median, Range | Skewness, SE | Kurtosis, SE |
|-----------------------------------------------------------------------------------------------------------|----------------|--------------|---------------|--------------|--------------|
| <b>Getting up in the morning</b>                                                                          |                |              |               |              |              |
| not at all easy                                                                                           | 19760, (4)     | 3.038,0.0026 | 3,1-4         | -0.649,0.008 | -0.062,0.016 |
| not very easy                                                                                             | 69938, (14.1)  |              |               |              |              |
| fairly easy                                                                                               | 246646, (49.6) |              |               |              |              |
| very easy                                                                                                 | 160487, (32.3) |              |               |              |              |
| <b>Chronotype Morning to Evening</b>                                                                      |                |              |               |              |              |
| definitely a morning person                                                                               | 120364, (27.1) | 2.170,0.003  | 2,1-4         | 0.303,0.008  | -0.912,0.016 |
| more a morning than evening person                                                                        | 157377, (35.4) |              |               |              |              |
| more an evening than a morning person                                                                     | 126333, (28.4) |              |               |              |              |
| definitely an evening person                                                                              | 40110, (9)     |              |               |              |              |
| <b>Daytime dozing</b>                                                                                     |                |              |               |              |              |
| Sometimes                                                                                                 | 105969, (88.3) | 1.115,0.001  | 1,1-3         | 2.432,0.008  | 4.006, 0.106 |
| Often                                                                                                     | 14052(11.7)    |              |               |              |              |
| Always                                                                                                    | 43, (0)        |              |               |              |              |
| <b>Nap during day</b>                                                                                     |                |              |               |              |              |
| Rarely/Never                                                                                              | 281069, (56.1) | 1.834,0.001  | 2,1-3         | 0.064,0.008  | -0.332,0.016 |
| Sometimes                                                                                                 | 192655, (38.5) |              |               |              |              |
| Usually                                                                                                   | 26886, (5.4)   |              |               |              |              |
| <b>Sleeplessness insomnia</b>                                                                             |                |              |               |              |              |
| Never/Rarely                                                                                              | 105969, (88.3) | 1.115,0.001  | 1,1-3         | 2.432,0.008  | 4.006,0.016  |
| Sometimes                                                                                                 | 14052, (11.7)  |              |               |              |              |
| Usually                                                                                                   | 43, (0)        |              |               |              |              |
| <b>Snoring</b>                                                                                            |                |              |               |              |              |
| Yes                                                                                                       | 173360, (37.2) | 1.555,0.001  | 2,1-2         | -0.225,0.008 | -1.949,0.016 |
| No                                                                                                        | 292092, (62.8) |              |               |              |              |
| <b>Recommended Sleep durations (recoded as 0, recommended, 1 Perhaps appropriate, 2, not recommended)</b> |                |              |               |              |              |
|                                                                                                           |                | 1.424,0.001  | 1,1-0.630     | 1.203,0.008  | 0.309,0.015  |
| <b>Daytime sleepiness (factor score from PCA reduction of Nap during day,</b>                             |                |              |               |              |              |
|                                                                                                           |                | -0.004,0.003 | -0.058,-1.125 | 1.242,0.008  | 1.636,0.015  |
| <b>Ease of rising controlled for Morningness-Eveningness</b>                                              |                |              |               |              |              |
|                                                                                                           |                | -0.078,0.002 | -0.175,-2.567 | -0.57,0.008  | 0.342,0.015  |

## 3. Principal Components Analysis/ Principal Axis Factoring

Variables entered: Age-corrected Recommended Sleep durations, Sleeplessness insomnia, Snoring, Daytime sleepiness, Ease of rising (see Table S1)

### Total Variance Explained

| Component | Initial Eigenvalues |               |              |
|-----------|---------------------|---------------|--------------|
|           | Total               | % of Variance | Cumulative % |
| 1         | 1.312               | 26.241        | 26.241       |
| 2         | 1.002               | 20.64         | 46.881       |
| 3         | 0.952               | 19.031        | 65.912       |
| 4         | 0.886               | 17.714        | 83.631       |
| 5         | 0.818               | 16.369        | 100          |

#### Scree test indicated single factor solution

| Component | Initial Eigenvalues |               |              |
|-----------|---------------------|---------------|--------------|
|           | Total               | % of Variance | Cumulative % |
| 1         | 1.324               | 26.473        | 26.473       |
| 2         | 0.995               | 19.602        | 46.075       |
| 3         | 0.943               | 18.85         | 65.926       |
| 4         | 0.917               | 18.347        | 84.273       |
| 5         | 0.768               | 15.727        | 100          |

Extraction Method: Principal Axis Factoring.

Scree test indicated single factor solution

Factor scores from the single component/factor created using PCA/PAF are highly correlated  $r_{(410227)} = 0.961606$ .

#### 4. Intercorrelation of Sleep Problem Reports

|                                                                                              | 1        | 2        | 3        | 4        | 5        | 6        | 7        |
|----------------------------------------------------------------------------------------------|----------|----------|----------|----------|----------|----------|----------|
| <b>1. Sleep duration</b><br>(1-23 hrs)                                                       | <b>1</b> | 493843   | 442061   | 497534   | 497890   | 118820   | 462919   |
| <b>2. Ease of getting up</b><br>(not at all/not very/fairly/very easy)                       | -0.023** | <b>1</b> | 443767   | 496096   | 496455   | 118922   | 461351   |
| <b>3. Chronotype</b><br>(definitely morning, more morning, more evening, definitely evening) | 0.029**  | -0.468** | <b>1</b> | 443755   | 443942   | 106639   | 413771   |
| <b>4. Nap during day</b><br>(never, rarely/sometimes/usually)                                | 0.124**  | -0.017** | -0.023** | <b>1</b> | 500258   | 119748   | 464855   |
| <b>5. Sleeplessness/insomnia</b><br>(never, rarely/sometimes/usually)                        | -0.233** | -0.116** | 0.006**  | 0.057**  | <b>1</b> | 119935   | 465163   |
| <b>6. Daytime dozing</b><br>(sometimes/often/always)                                         | 0.017**  | -0.090** | 0.011**  | 0.246**  | 0.087**  | <b>1</b> | 110638   |
| <b>7. Snoring</b><br>(yes/no)                                                                | -0.022** | 0.001    | -0.014** | -0.072** | 0.032**  | -0.039** | <b>1</b> |

\*\* Pearson correlation is significant at the 0.001 level (2-tailed). Sample size for each correlation above diagonal.

#### 5. Problematical Sleep Index: Reliability

To assess the reliability of this new index, these calculations were repeated for two randomly selected cohorts from the whole sample, the Problematic Sleep Index was not statistically different for the first ( $N = 48,618$ ;  $0.7194 \pm .1271$ ) and second ( $N = 48,815$ ;  $.7190 \pm .1276$ ) of these cohorts ( $t_{(97,750)} = 0.486$ ,  $p > .63$ ). Separate linear regressions were calculated for each cohort, the r-square values in each case showed that the raw responses constituted most of the variance in each index (both 92%). First cohort regression equation was used to generate predicted scores for the second cohort and vice versa. Correlations between these predicted and actual values for each cohort demonstrated that these regression weights generalised well to 'new' samples ( $r_{(48,599)} = 0.709$ ;  $r_{(48,795)} = 0.704$ ; both  $p < .00001$ ).
